# Supplementary material for: Benchmarking computational methods for single-cell chromatin data analysis
Source: PubMed Central journal article supplement (PMC11328424; doi:10.1186/s13059-024-03356-x), 2024-08-16
Supplement: 13059_2024_3356_MOESM1_ESM.pdf [file 13059_2024_3356_MOESM1_ESM.pdf]

Fig S1

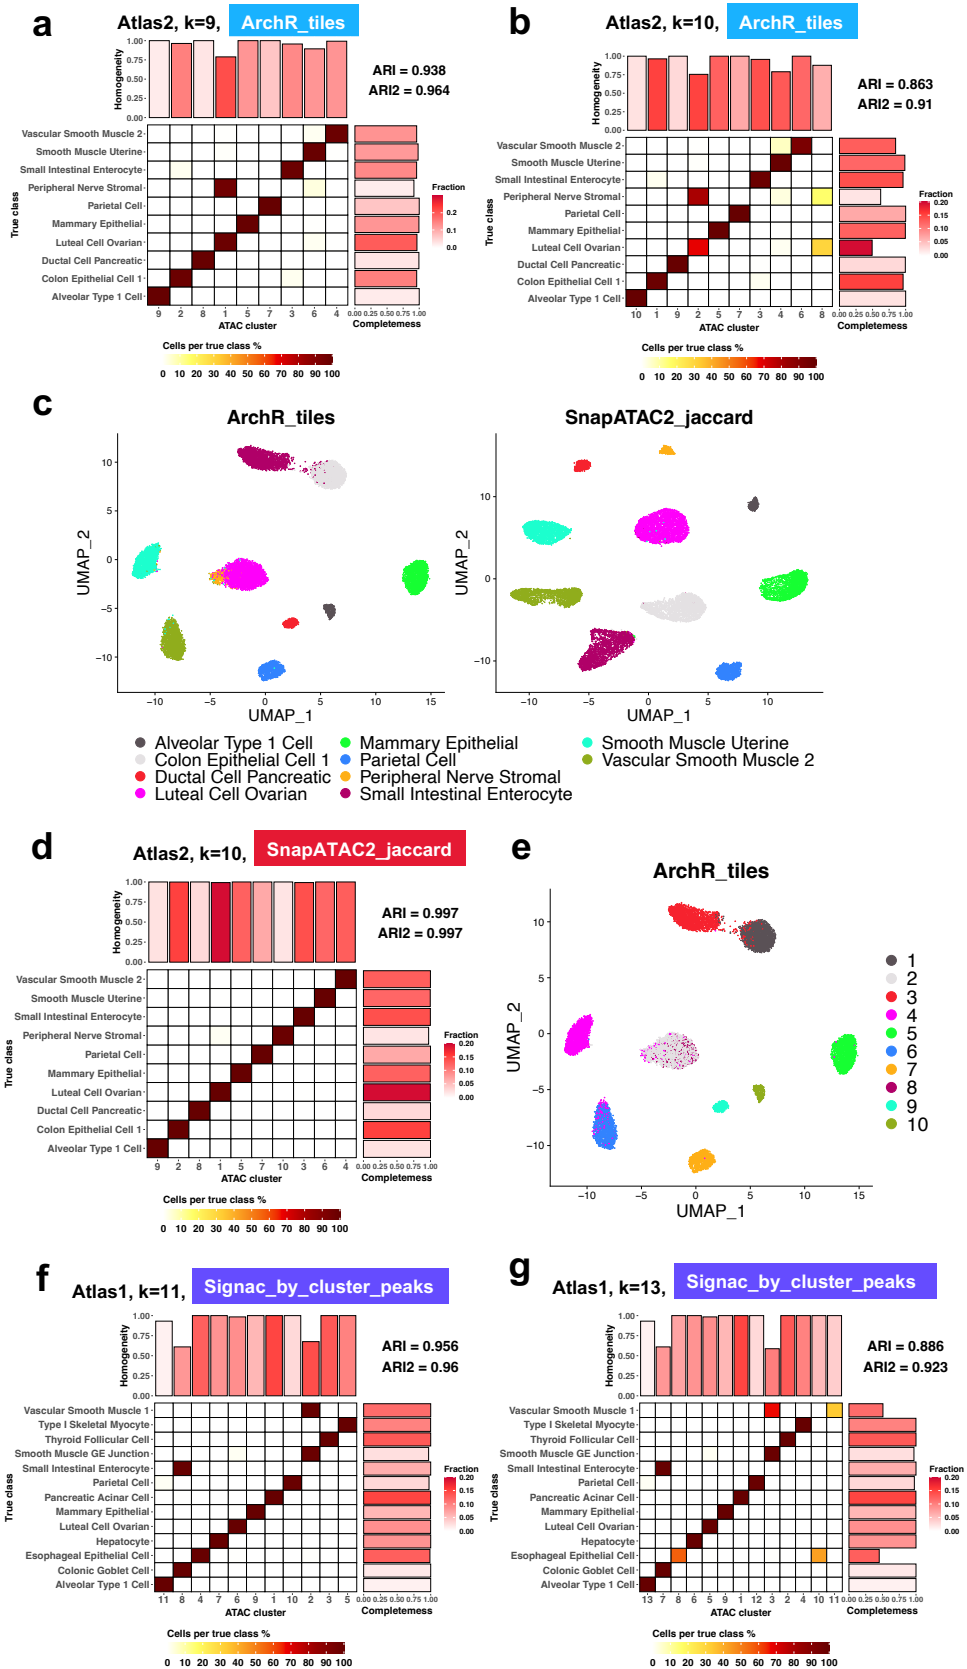

**Figure S1:** **a,b** Clustering solutions by ArchR\_tiles on Atlas2, with different numbers of clusters identified. **c** UMAP of Atlas2 generated by ArchR\_tiles and SnapATAC2\_jaccard, annotated by the true classes. **d** The corresponding clustering solutions by SnapATAC2\_jaccard on Atlas2. **e** UMAP annotated by the clustering solutions of ArchR\_tiles in **b**. Cluster 8 is the wrongly identified clusters. **f,g** Clustering solutions by Signac\_by\_cluster\_peaks in dataset Atlas1, with different numbers of clusters identified.

Fig S2

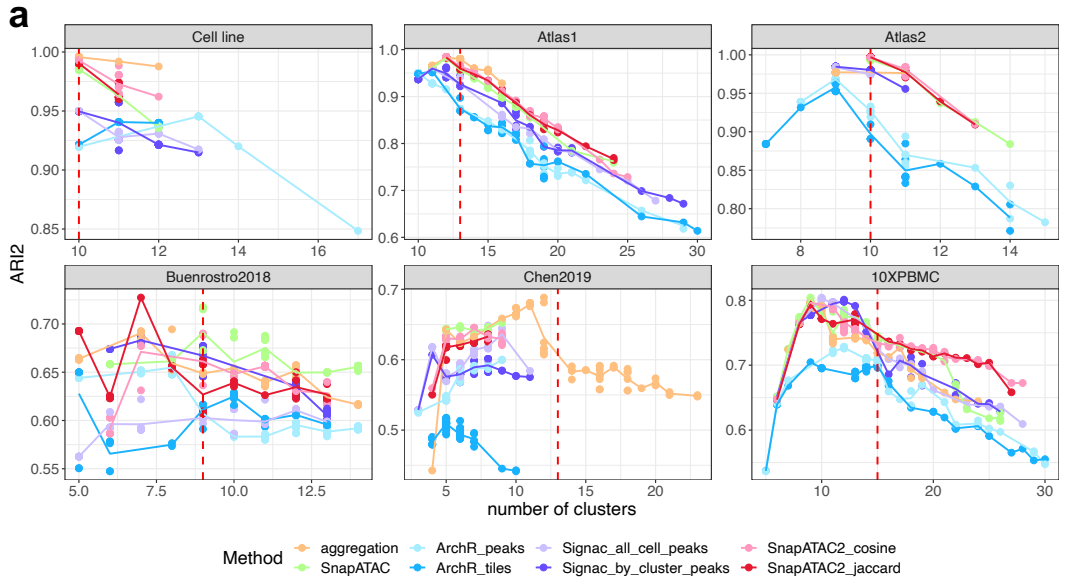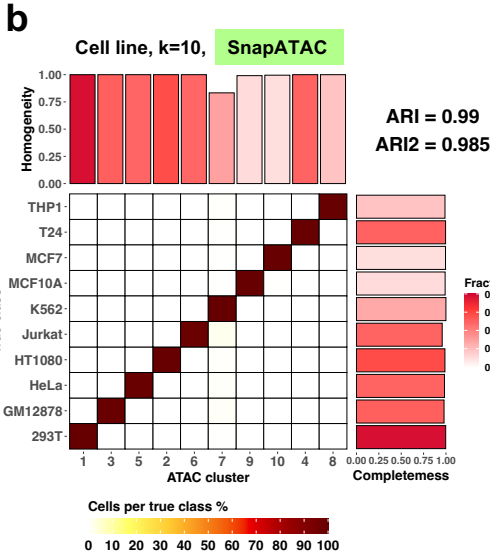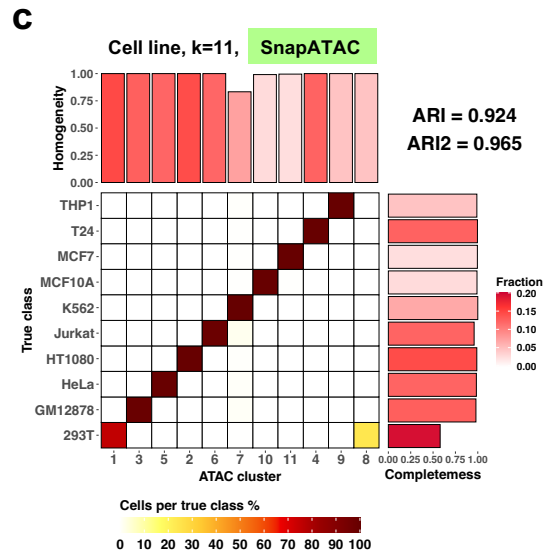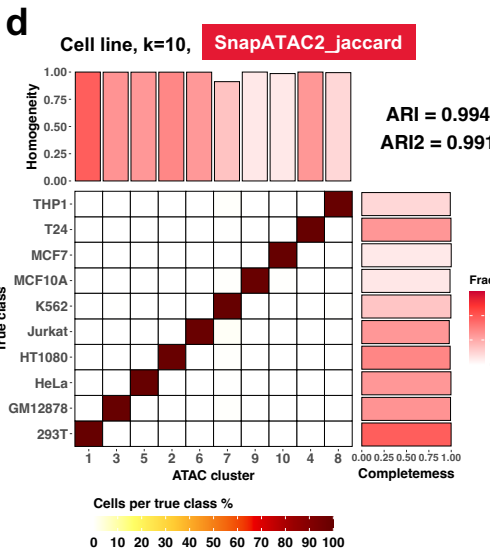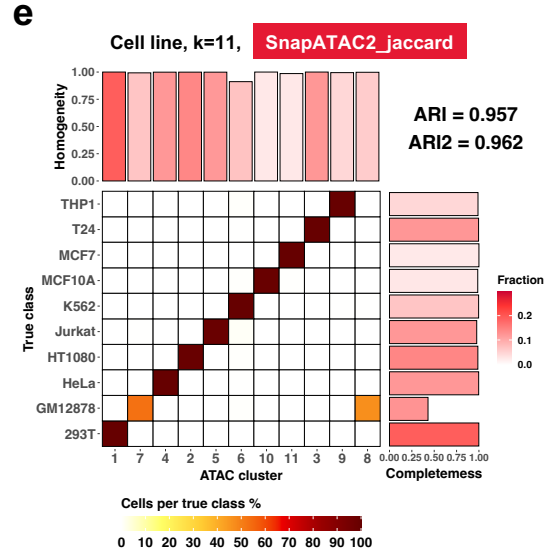

**Figure S2:** **a** ARI2 plotted against various number of clusters; as shown in Figure 3a, each subpanel represents a dataset. Each point represents a clustering solution obtained by varying the resolution parameter and the random seed in Leiden algorithm. The line plot is the average ARI2 at a given number of clusters. **b-e** True classes and their fractions of agreement with the predicted clusters. **b-c** are SnapATAC on dataset Cell line, and **d-e** are SnapATAC2\_jaccard on Cell line. The x-axis is the predicted clusters, and the y-axis is the ground truth classes. The colors of tiles indicate the proportion of cells from the corresponding true class (each row sums up to one). A clearer diagonal structure indicates better agreement. ARI and ARI2 are calculated and shown on the top right. The barplot on top shows the value of AV (Methods) and can be interpreted as the homogeneity of the corresponding clusters. The barplot on the right shows the value of AW and represents the completeness of each true class in the prediction. The color of the bars shows the proportion of cells in each cluster/ground truth class. In title, the corresponding datasets, methods, and number of clusters are indicated.

Fig S3

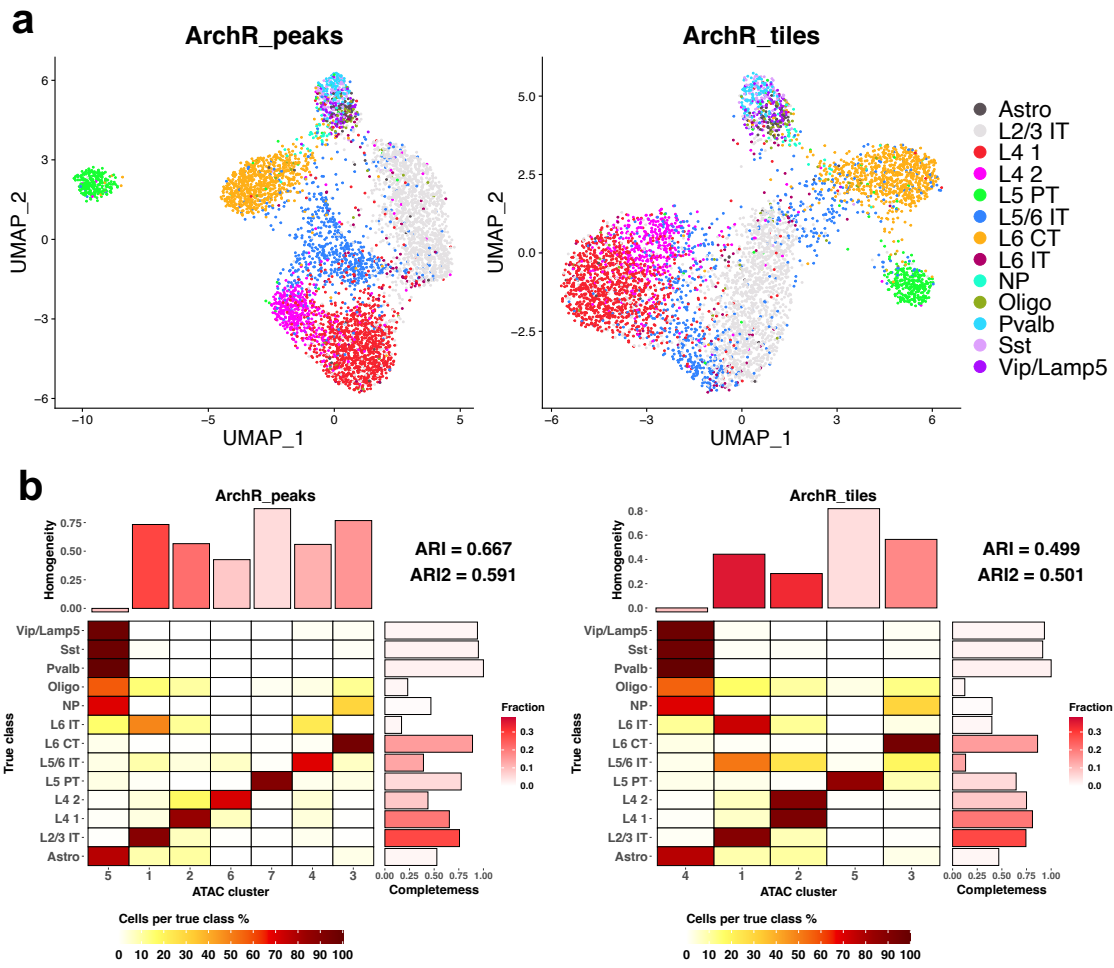

**Figure S3:** aUMAP of Chen2019 generated by ArchR\_peaks and ArchR\_tiles. **b** Clustering solutions of the highest ARI by ArchR\_peaks and ArchR\_tiles on Chen2019.

**Fig S4**

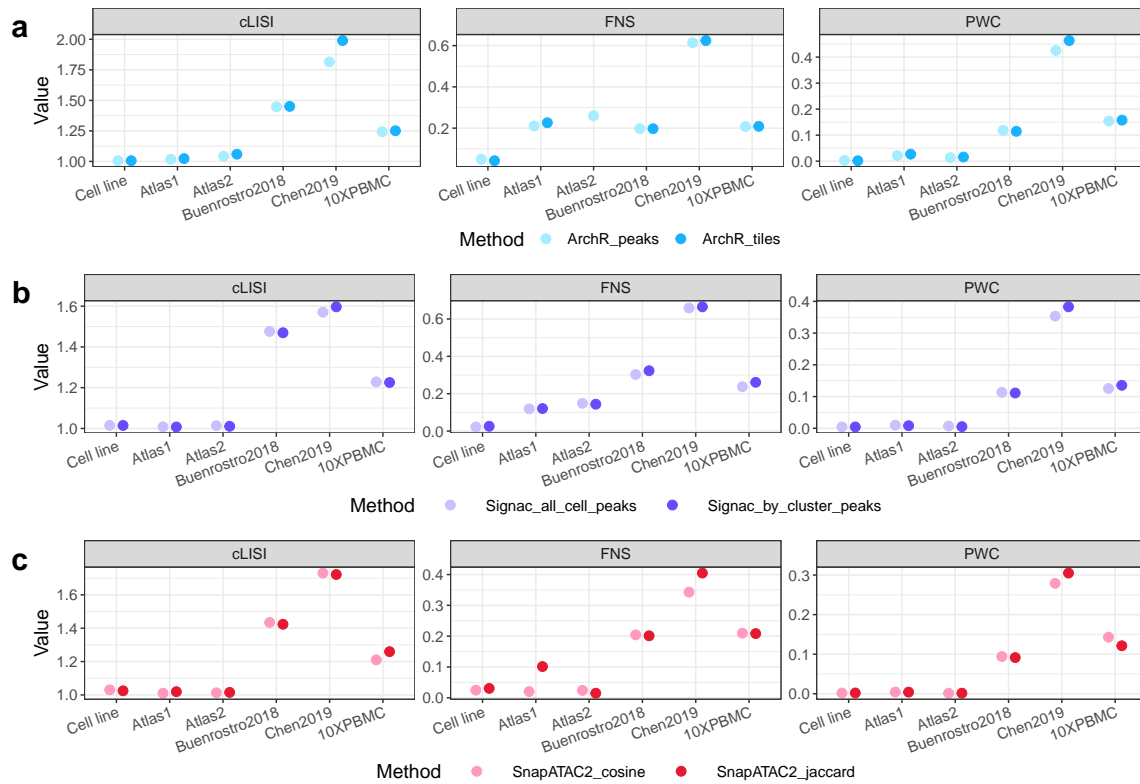

**Figure S4:** Comparison of the method performance between different data processing choices, measured by the embedding and graph-level metrics. **a** Comparing ArchR\_peaks and ArchR\_tiles. **b** Comparing Signac\_all\_cell\_peaks and Signac\_by\_cluster\_peaks. **c** Comparing SnapATAC2\_cosine and SnapATAC2\_jaccard.

Fig S5

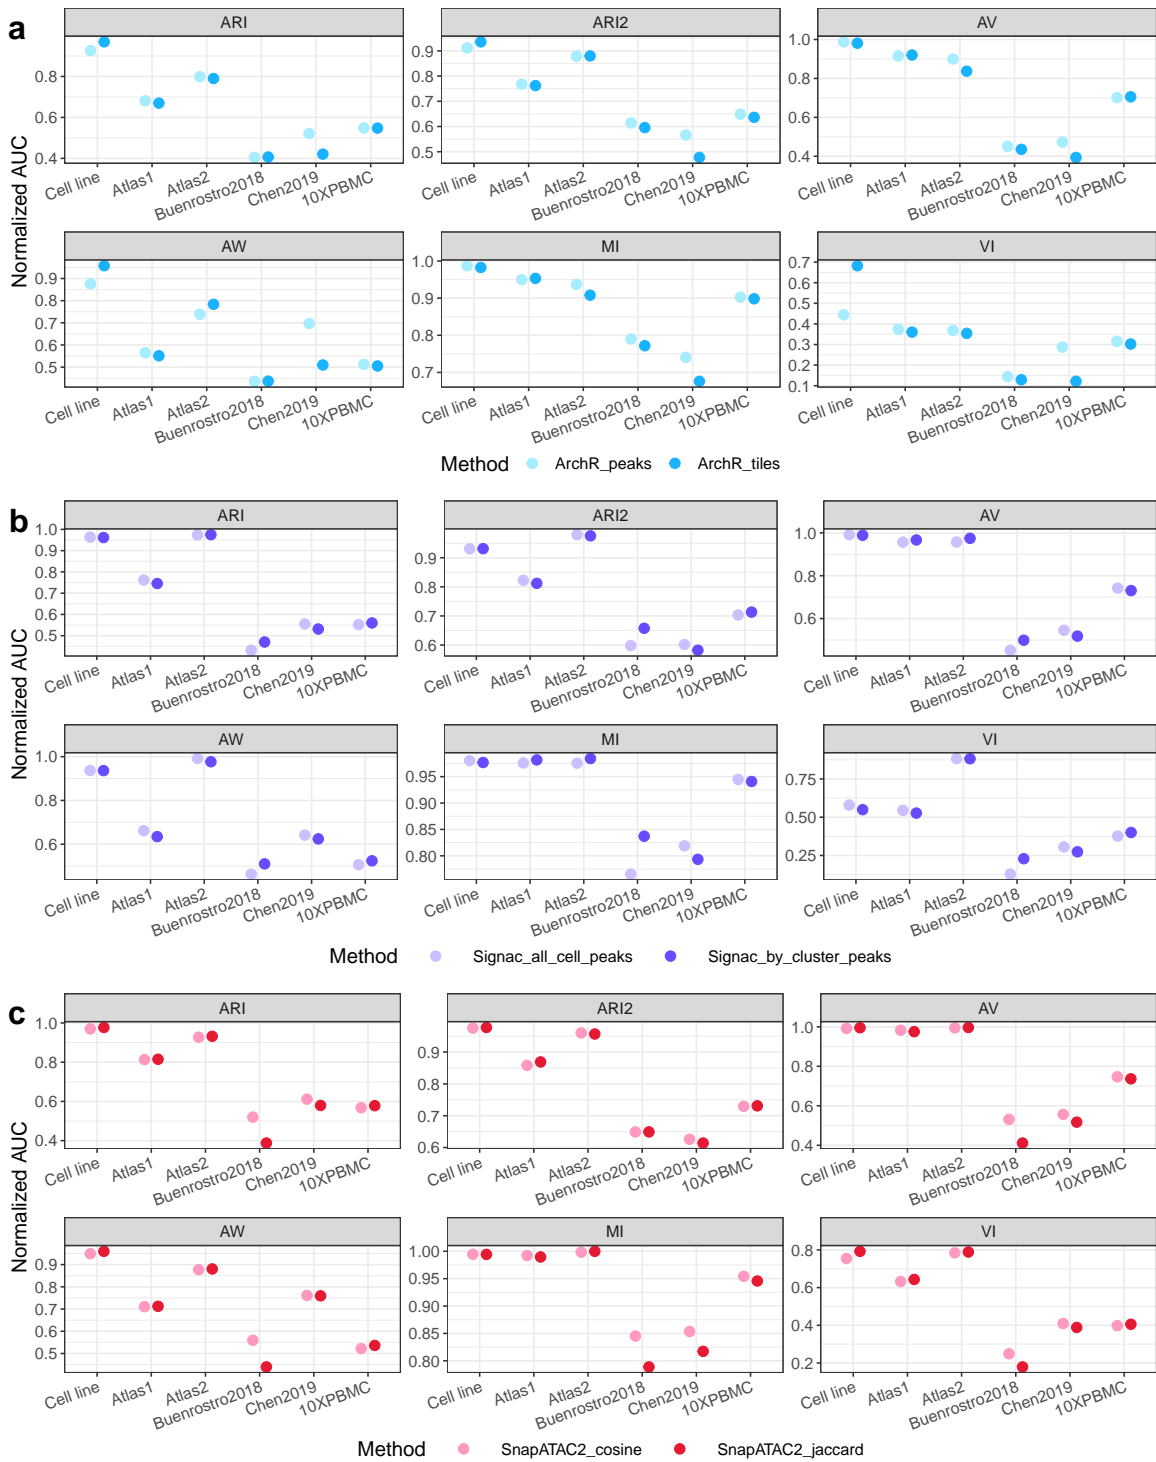

**Figure S5:** Comparison of the method performance between different data processing choices, measured by the partition-level metrics. **a** Comparing ArchR\_peaks and ArchR\_tiles. **b** Comparing Signac\_all\_cell\_peaks and Signac\_by\_cluster\_peaks. **c** Comparing SnapATAC2\_cosine and SnapATAC2\_jaccard.

Fig S6

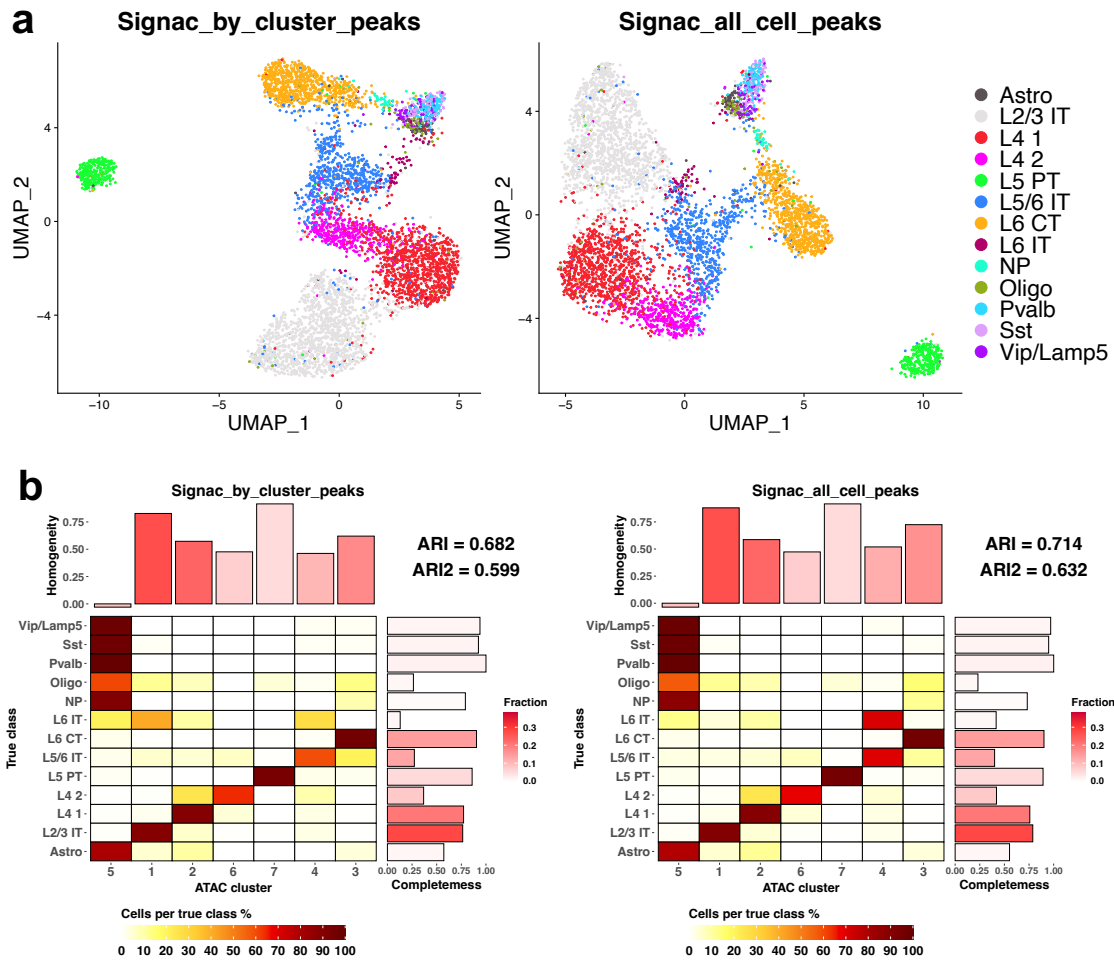

**Figure S6:** aUMAP of Chen2019 generated by Signac\_by\_cluster\_peaks and Signac\_all\_cell\_peaks. **b** Clustering solutions of the highest ARI by Signac\_by\_cluster\_peaks and Signac\_all\_cell\_peaks on Chen2019.



**Fig S7**

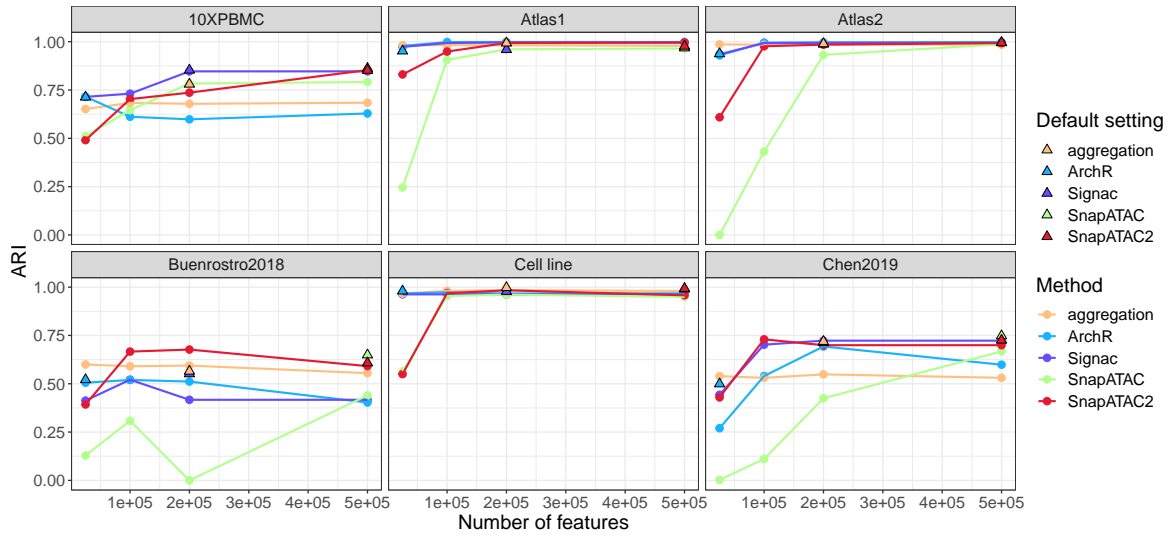

**Figure S7:** How the ARI changes as the number of features changes. The triangles are showing the ARI of each method using default settings, while the round points are showing the ARI of independent runs with different feature numbers.

**Fig S8**

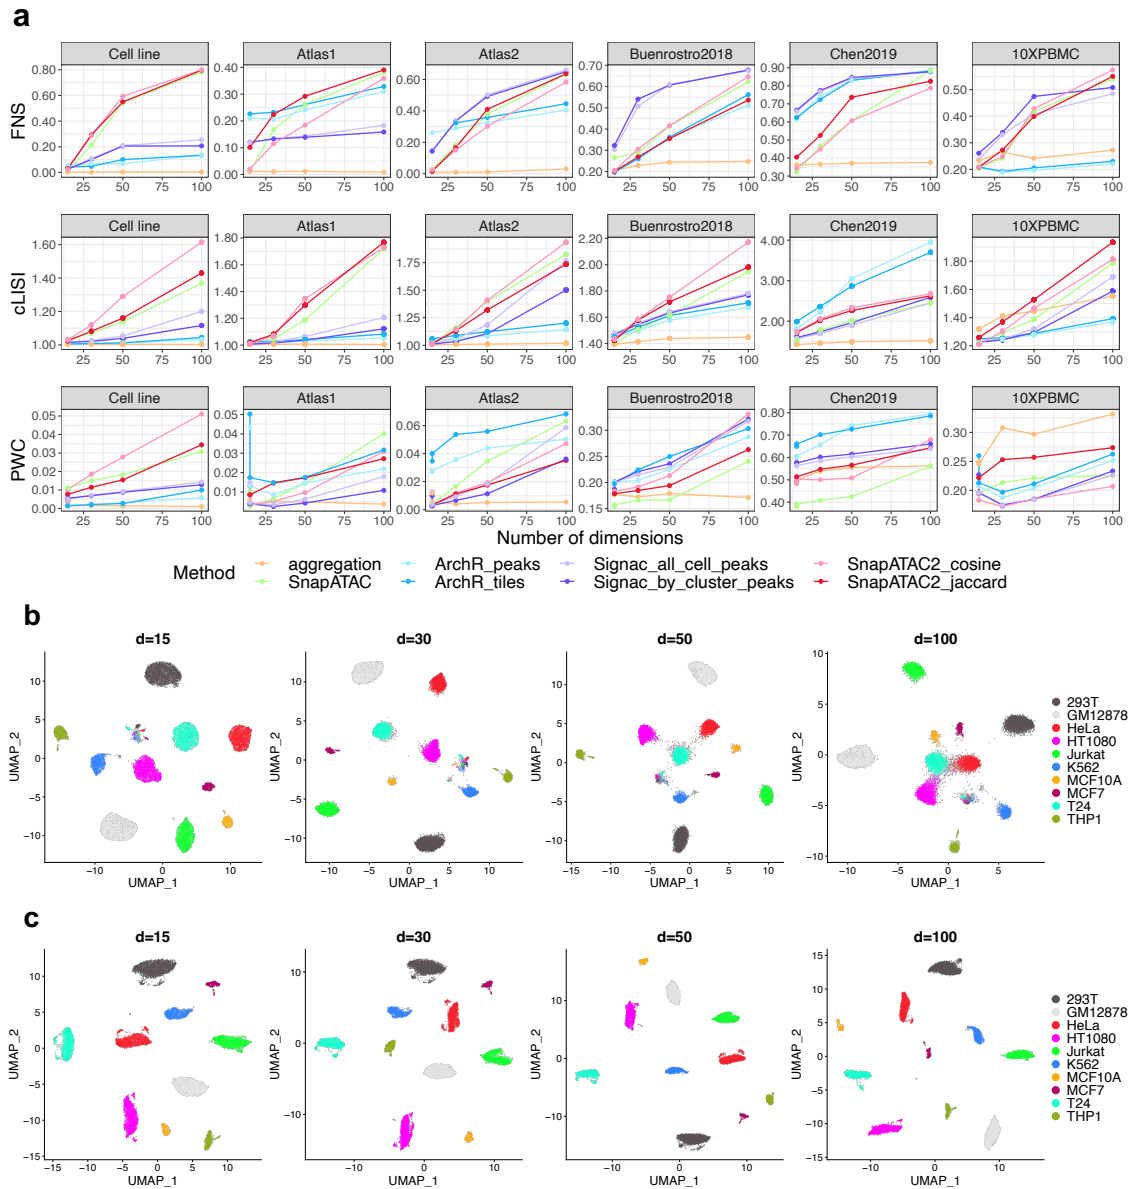

**Figure S8:** **a** Performance of each method across different choices of the number of latent dimensions, evaluated using embedding-level and graph-level metrics. **b** UMAP of Cell line dataset using SnapATAC2\_cosine method. **c** UMAP of Cell line dataset using aggregation method.

**Fig S9**

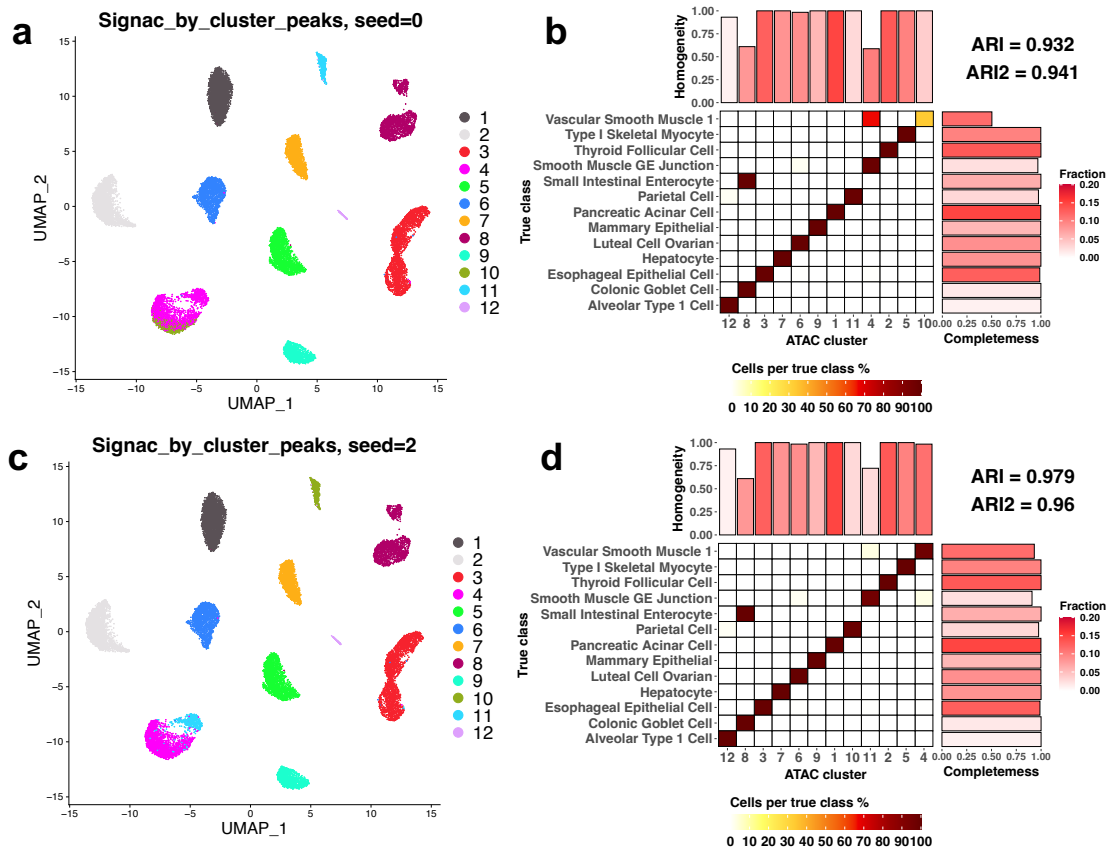

**Figure S9:** Clustering solutions of Signac\_by\_cluster\_peaks on Atlas1, using random seed 0 (a) or random seed 2 (b) when running Leiden algorithm.

Fig S10

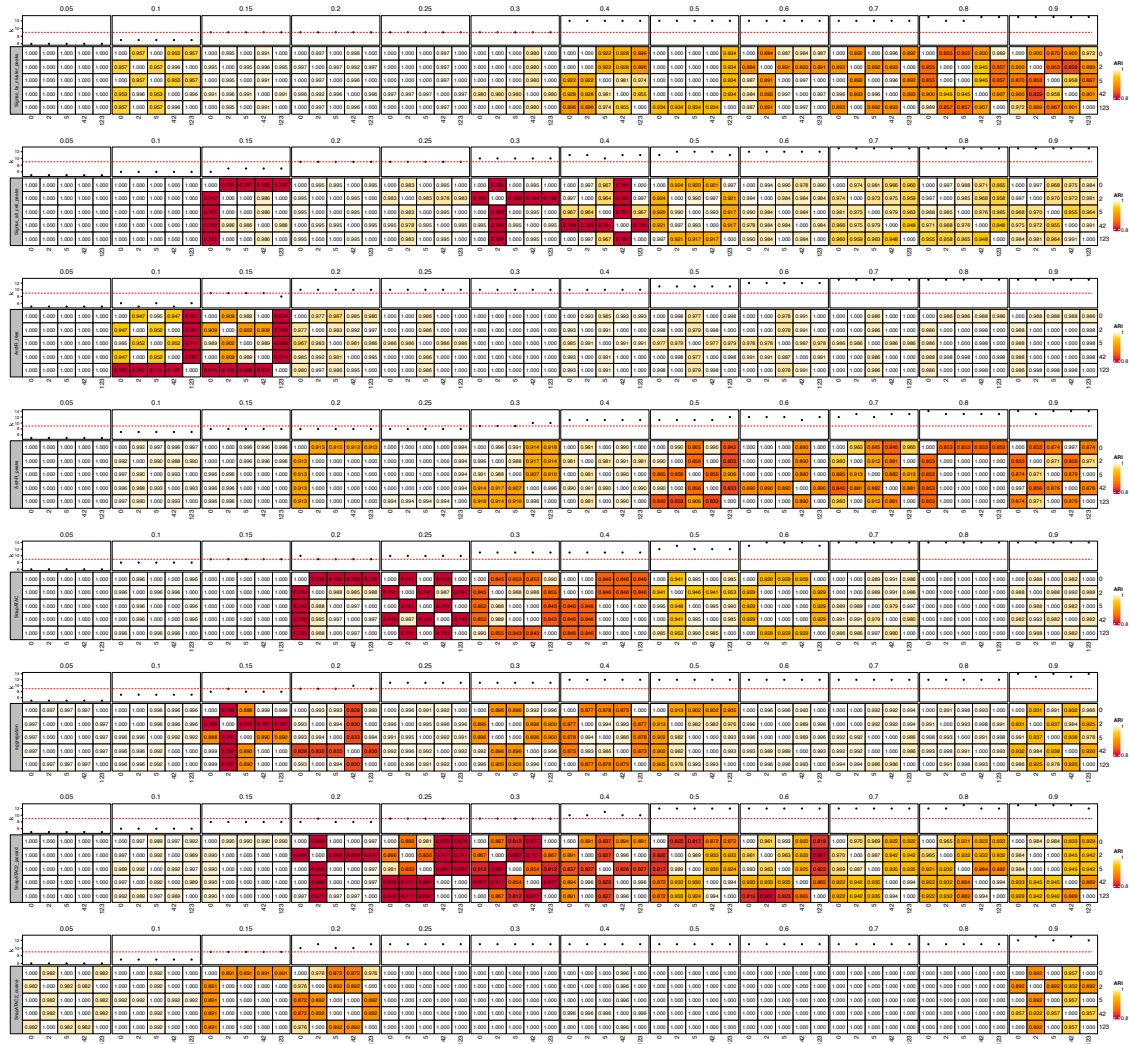

**Figure S10:** ARI between clustering solutions using the 5 random seeds, in combination with different methods and resolution parameters in dataset Buenrostro2018. The dot plots on top show the number of clusters, and the red horizontal lines are the ground truth cluster numbers.

Fig S11

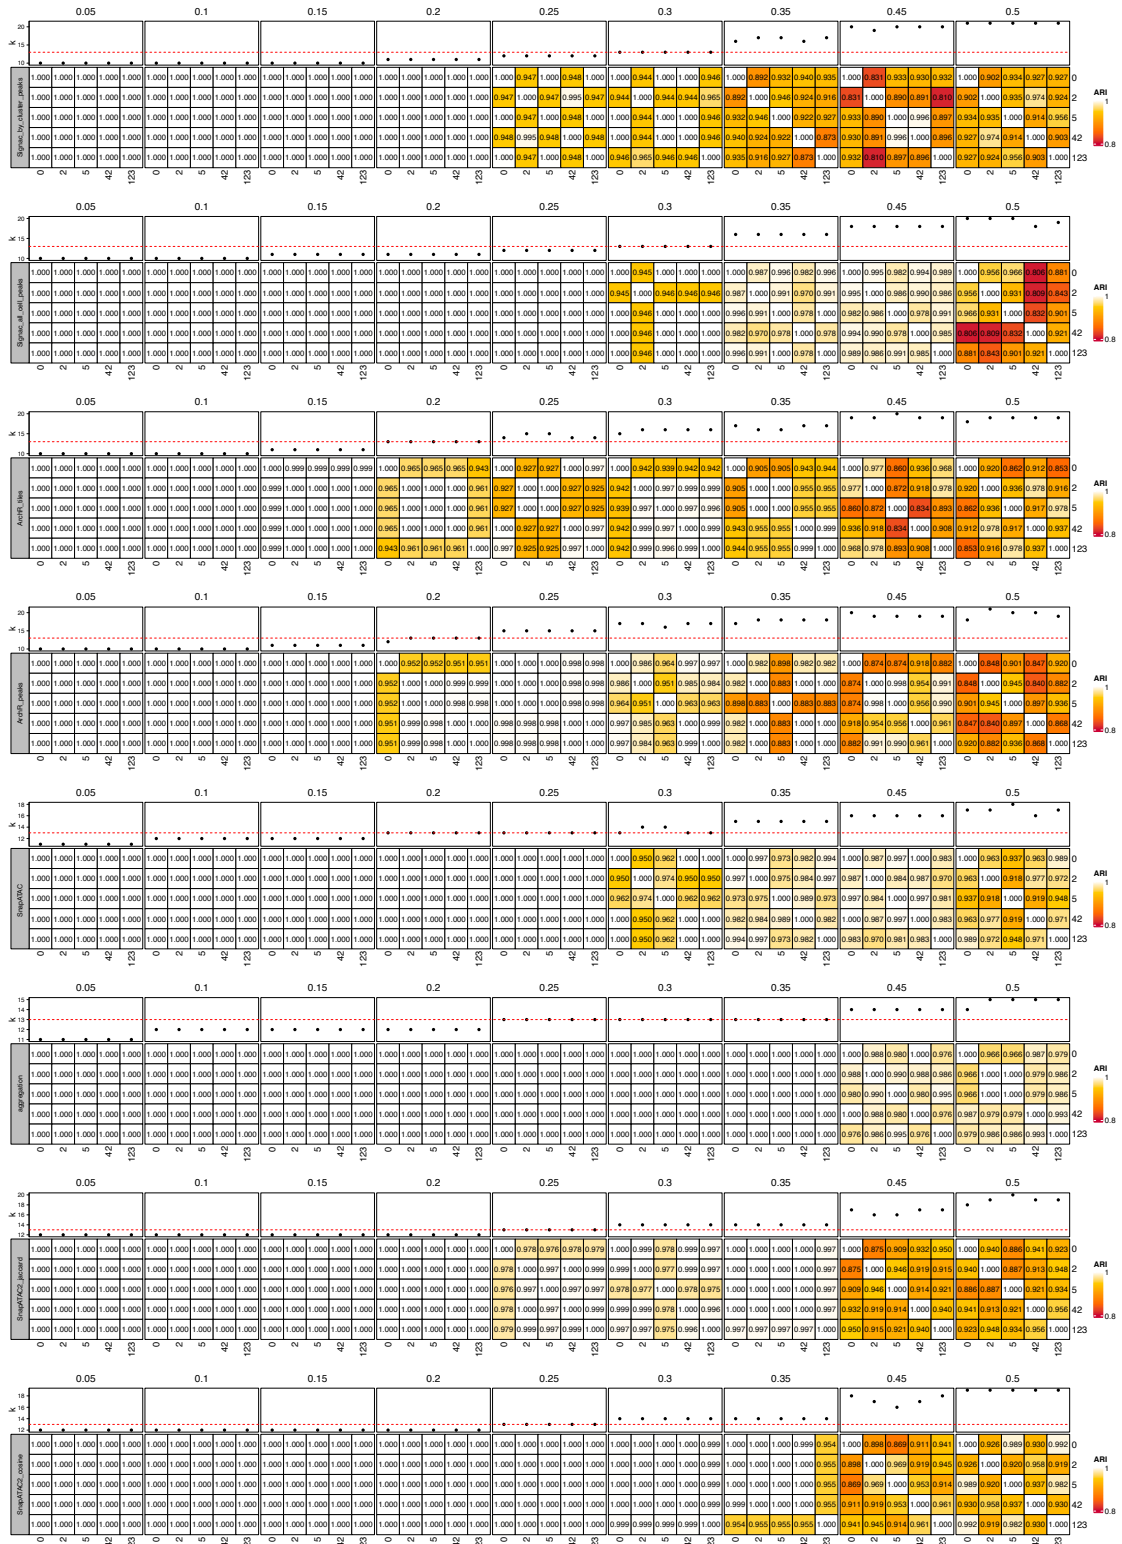

Figure S11: ARI between clustering solutions using the 5 random seeds, in combination with different methods and resolution parameters in dataset Atlas1. The dot plots on top show the number of clusters, and the red horizontal lines are the ground truth cluster numbers.

Fig S12

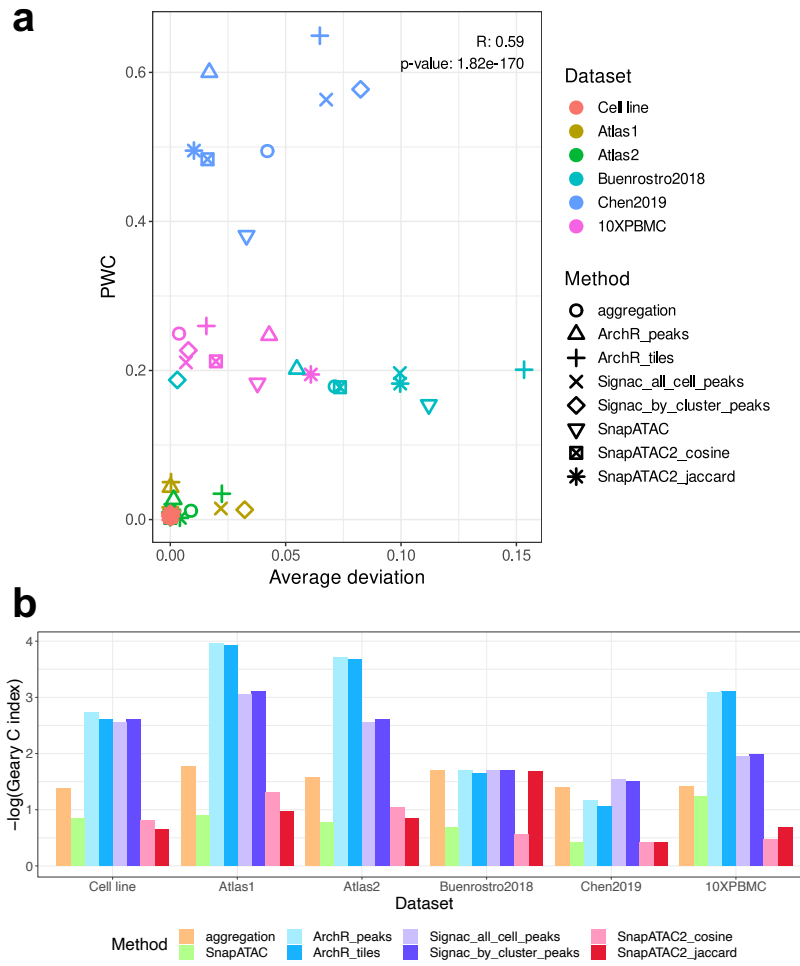

**Figure S12:** **a** Related to Figure S10, S11. x-axis is the deviation of ARI from 1, averaged across resolutions and random seeds. y-axis is the averaged PWC score of each dataset and method. **b** Spatial autocorrelation of library sizes measured by Geary's C index.

**Fig S13**

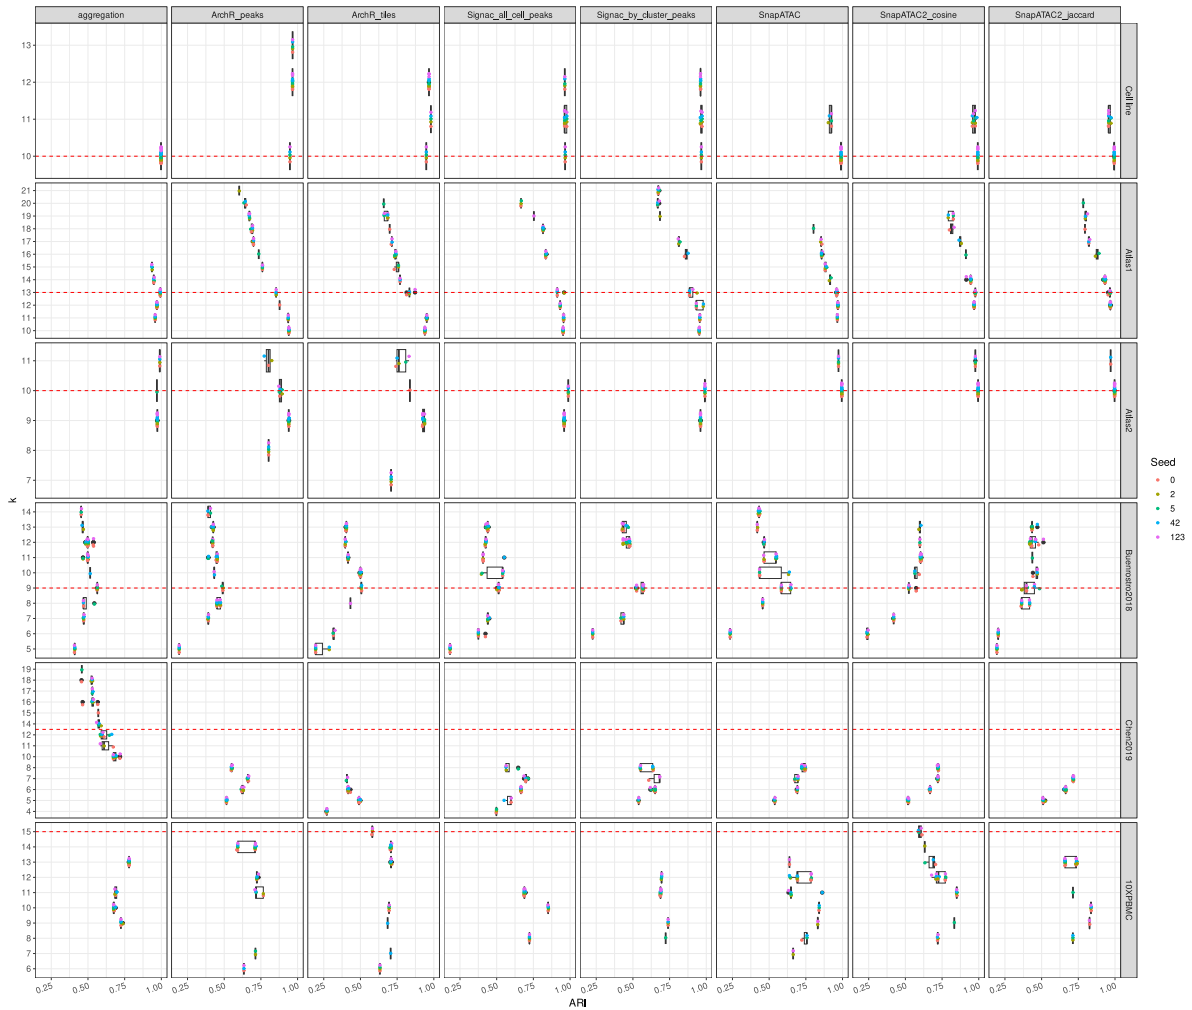

**Figure S13:** Boxplots of ARI between predicted clusterings and the true cell types, across datasets, methods, and the predicted number of clusters. The red horizontal lines are the ground truth cluster numbers.

**Fig S14**

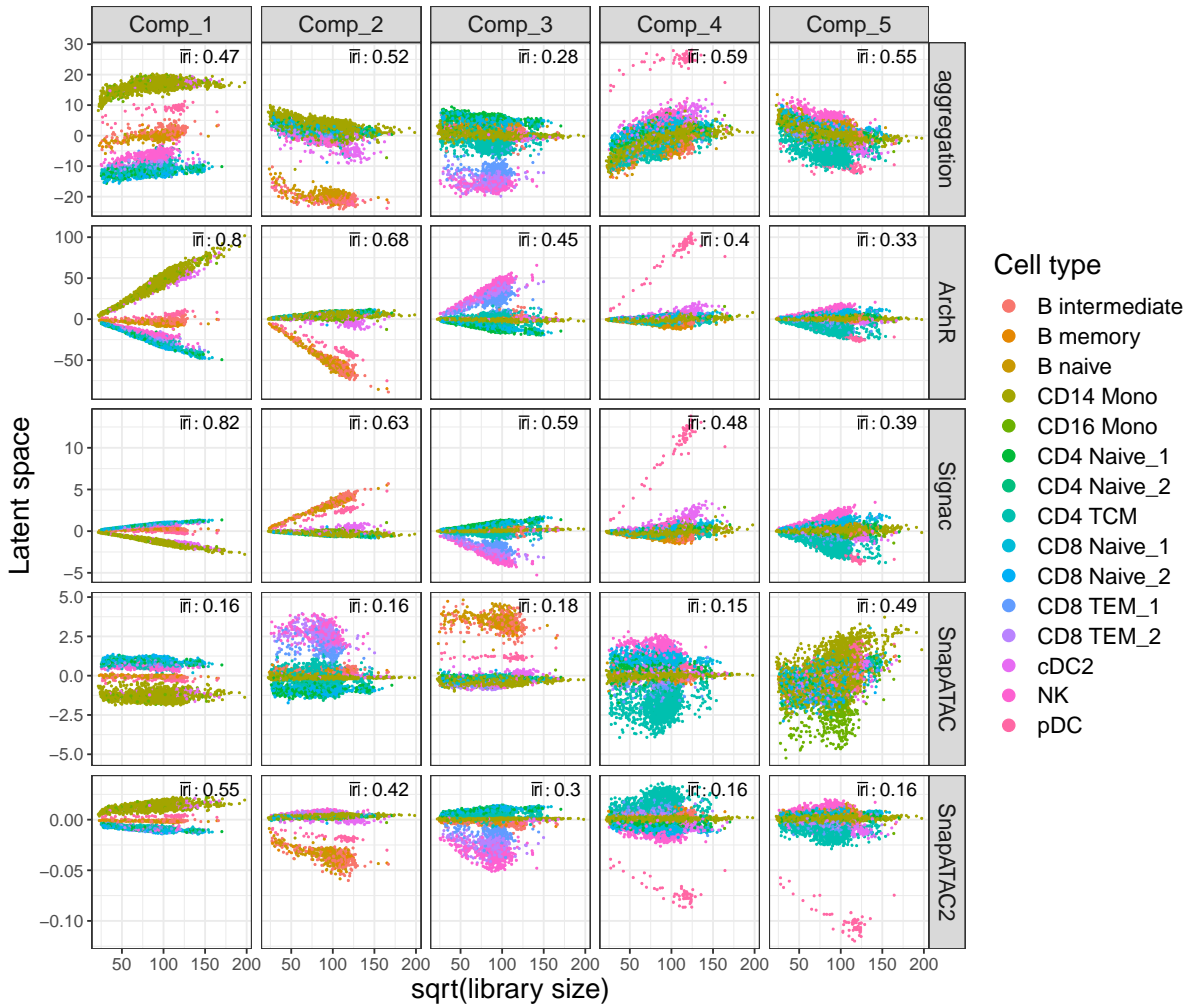

**Figure S14:** Scatter plots of the latent component value against the square root of fragment counts for dataset 10XPBMC. Colors are cell types, and the absolute Pearson's correlation coefficient between x- and y-axis are calculated and averaged across cell types for each latent components. See Methods for the details about the calculation.



**Fig S15**

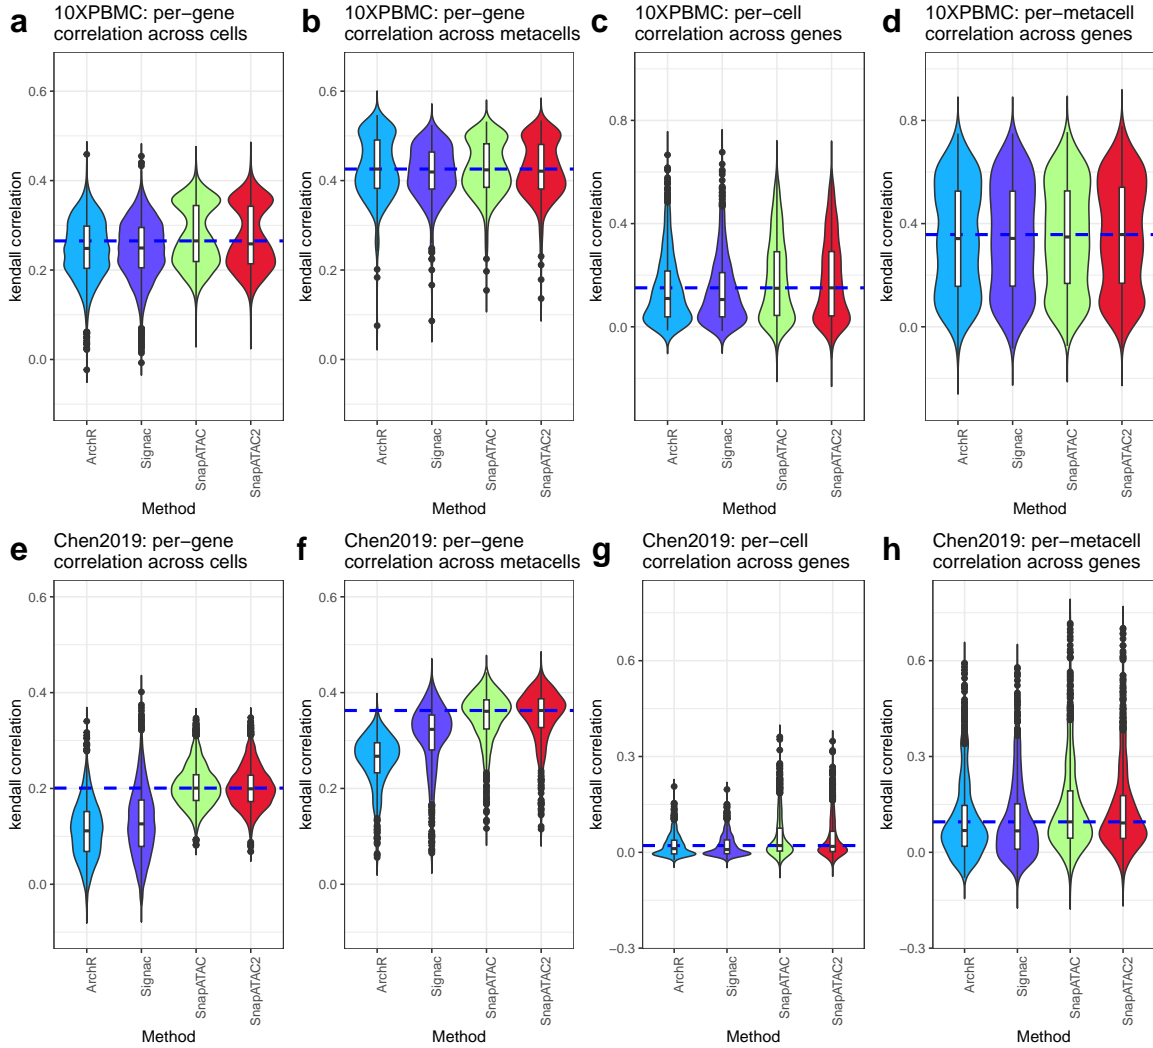

**Figure S15:** Distribution of Kendall's correlations between the inferred gene activity score and the aligned gene expression. **a-d** are data from 10XPBMC dataset, and **e-h** are data from Chen2019 dataset. In **a**, **b**, **e**, and **f**, the per-gene correlations are calculated for each cell (**a,e**) or each metacell (**b,f**) (500 metacells in total). In **c** and **g**, the per-cell correlations are calculated for each gene. In **d** and **h**, the per-metacell correlations are calculated for each gene. The blue dashed line represents the median value of the best-performing model. Violin plots represent the smoothed density of the distribution of the data.

Fig S16

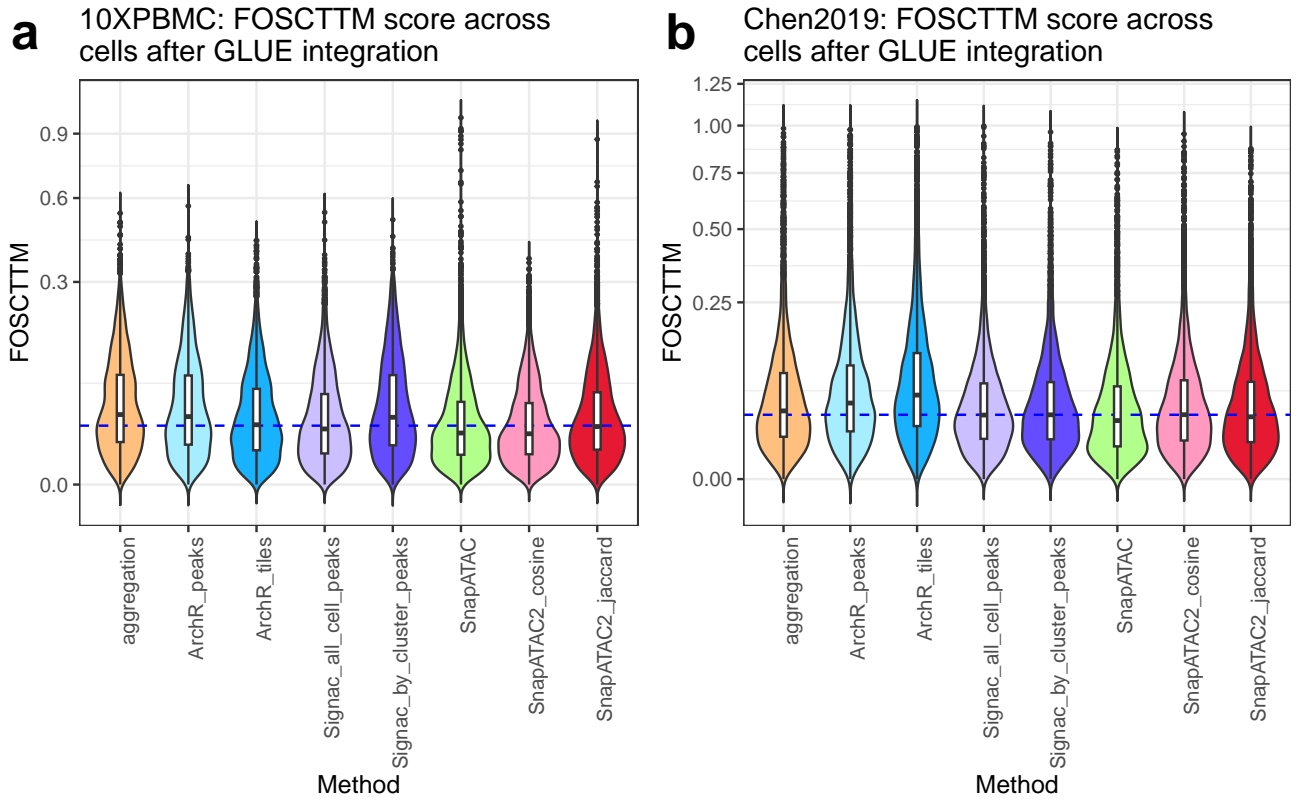

**Figure S16:** FOSCTTM score in dataset 10XPBMC (a) and Chen2019 (b). The y-axes use a square root scale, and the blue dashed lines represent the median values calculated across the median of each method.

Fig S17

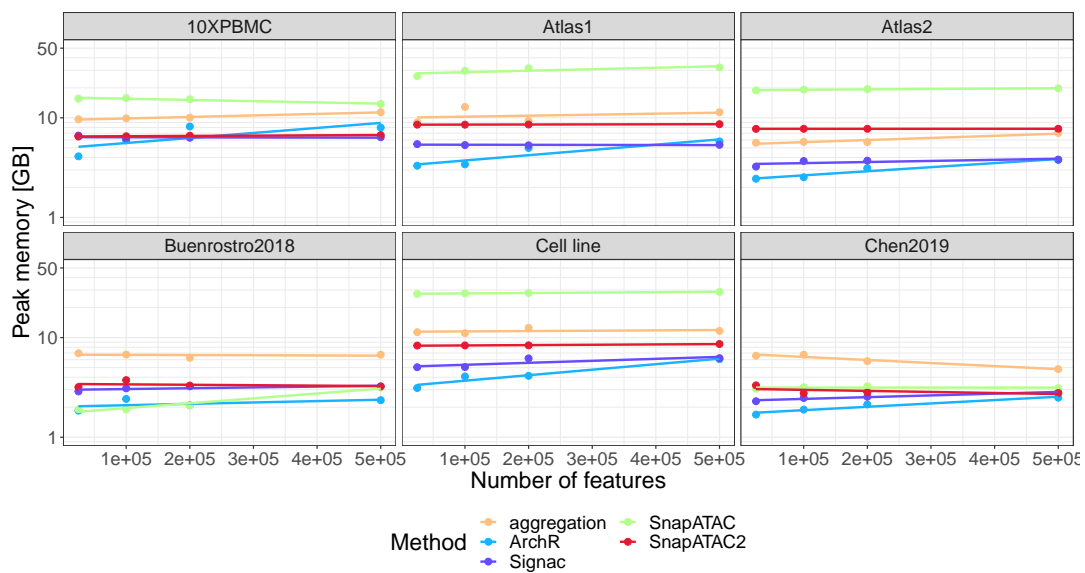

Figure S17: Peak memory usage when using different feature numbers.

Fig S18

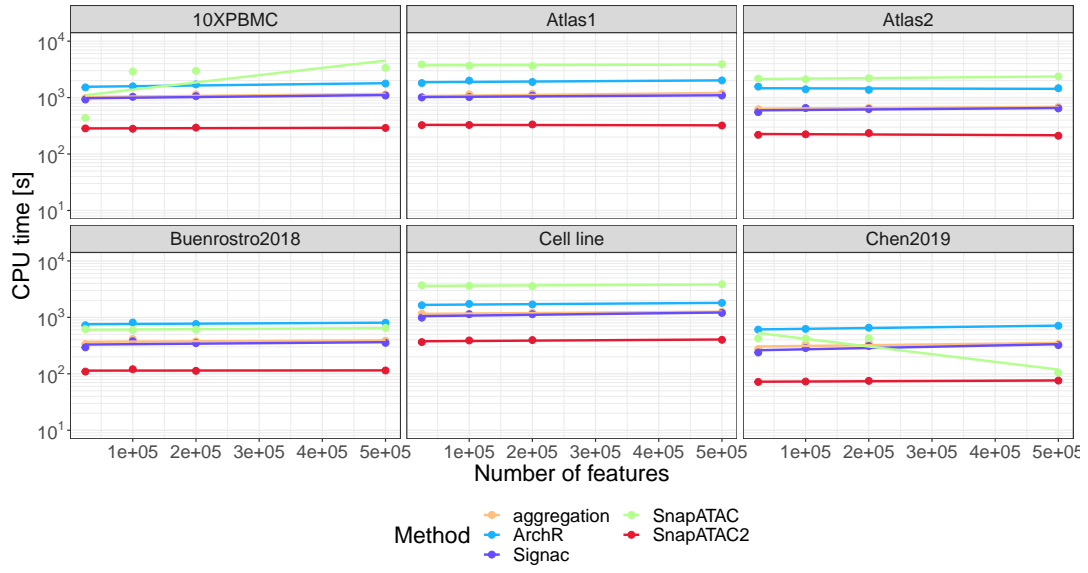

Figure S18: CPU time when using different feature numbers.

**Fig S19**

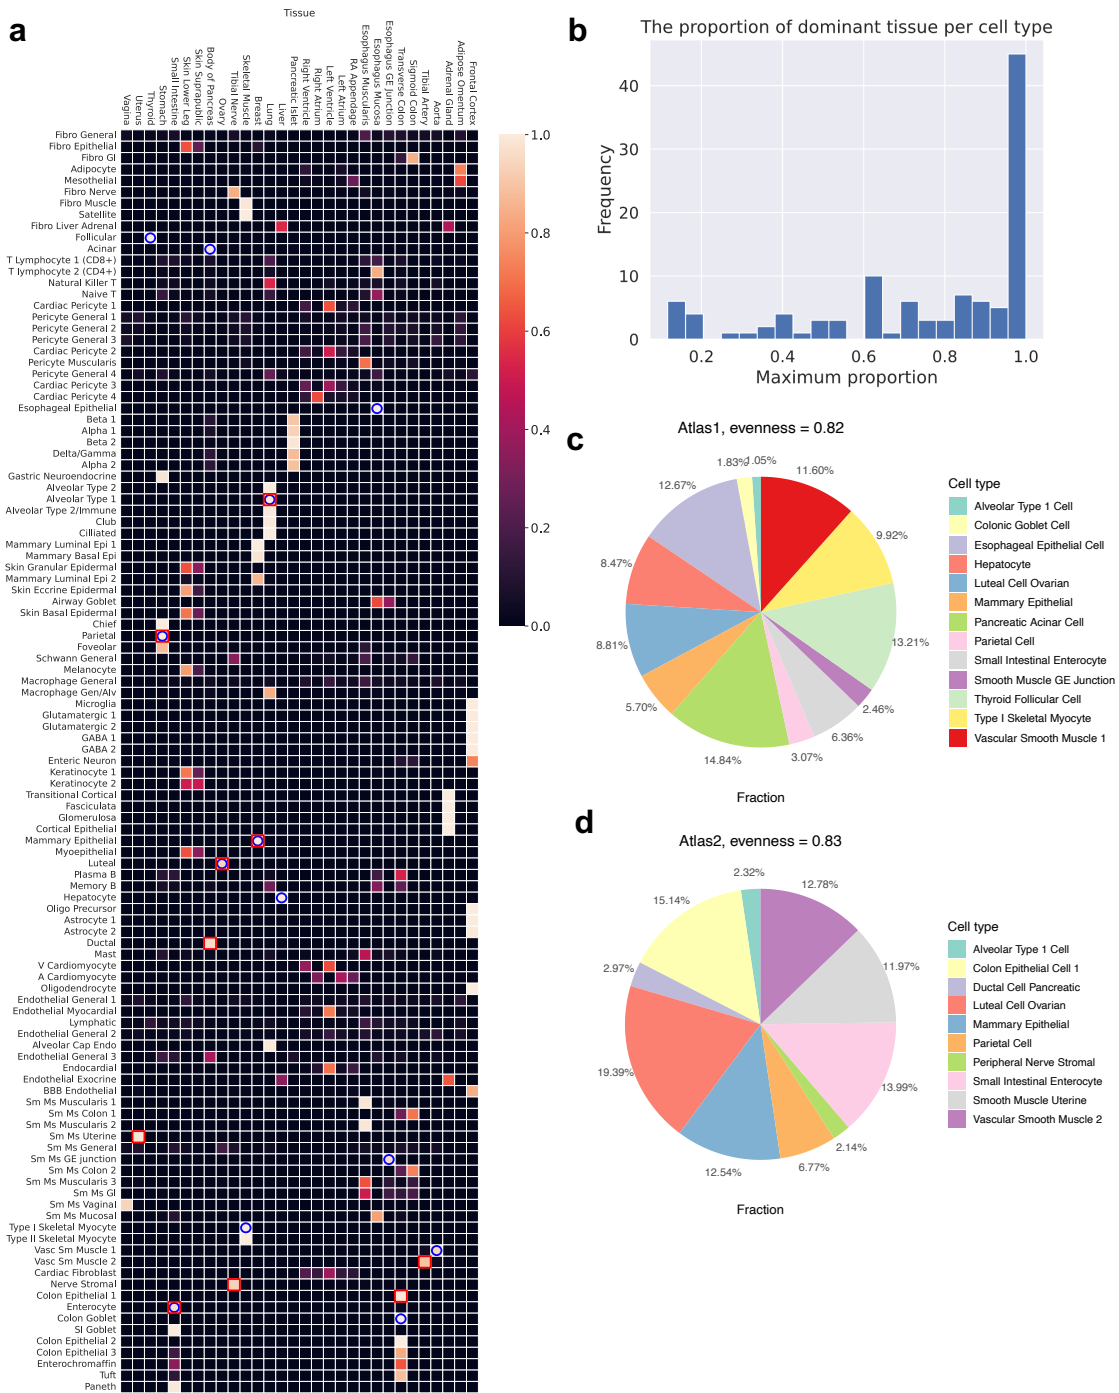

**Figure S19:** **a** Tissues and cell types in the human adult scATAC-seq atlas, with colors corresponding to column-wise proportion. Blue circles highlight the selected cell classes in Atlas1, and red rectangles highlight cell types in Atlas2. **b** Histogram of the proportion of dominant tissue for each cell type. For most cell types, the most dominant tissue contributes more than 85% cells. **c,d** Cell types and the proportion of our datasets Atlas1, Atlas2. Cell type evenness is calculated. For the evenness of other datasets, see Figure S21.

**Fig S20**

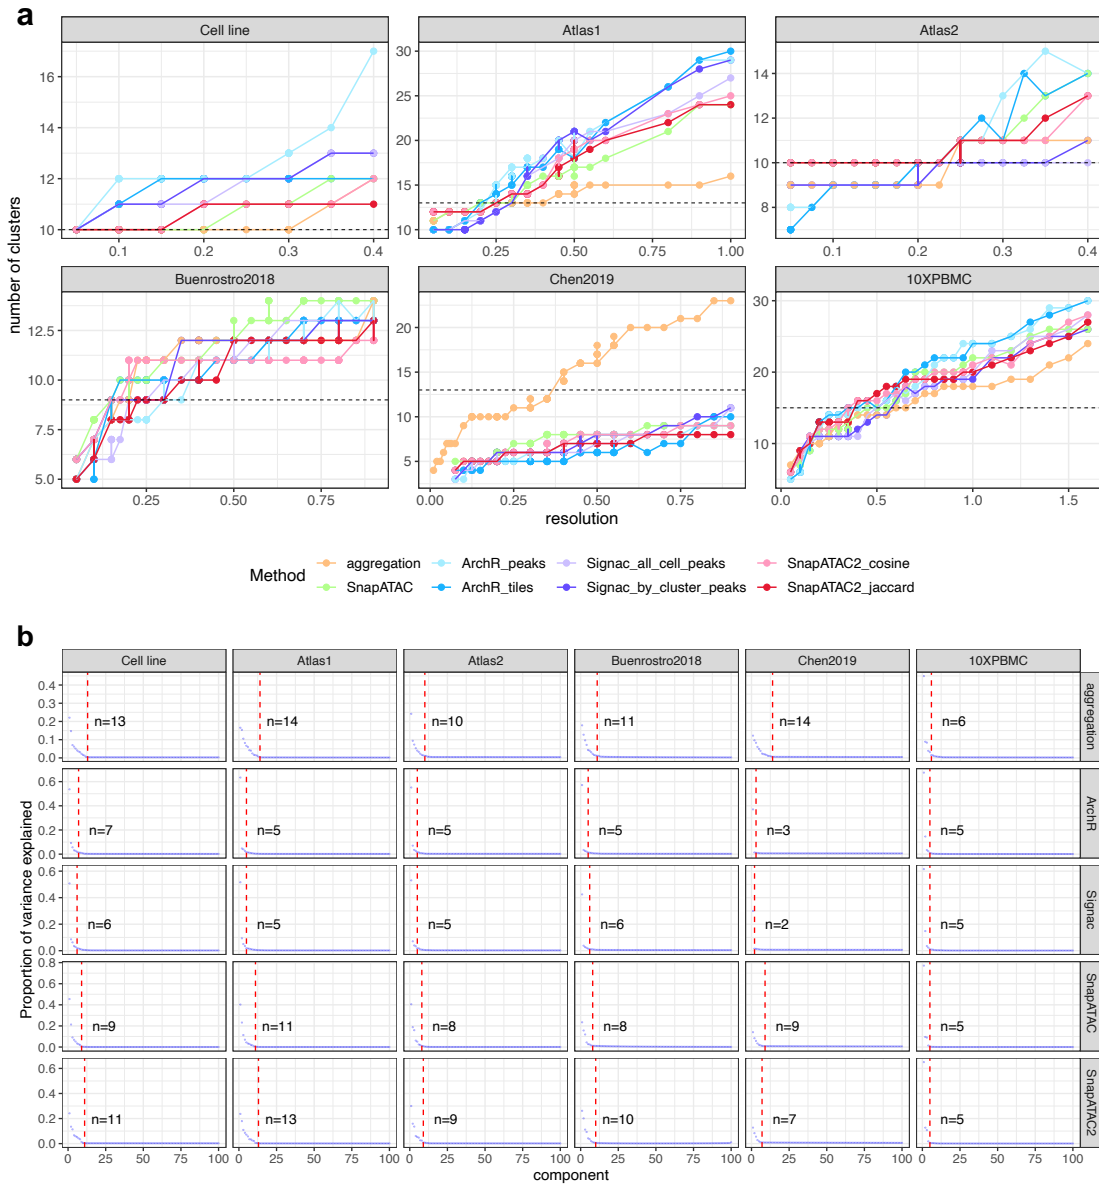

**Figure S20: a** The range of resolutions searched for each dataset, and how the number of clusters change as resolution changes. **b** Elbow plots for each method and datasets.

Fig S21

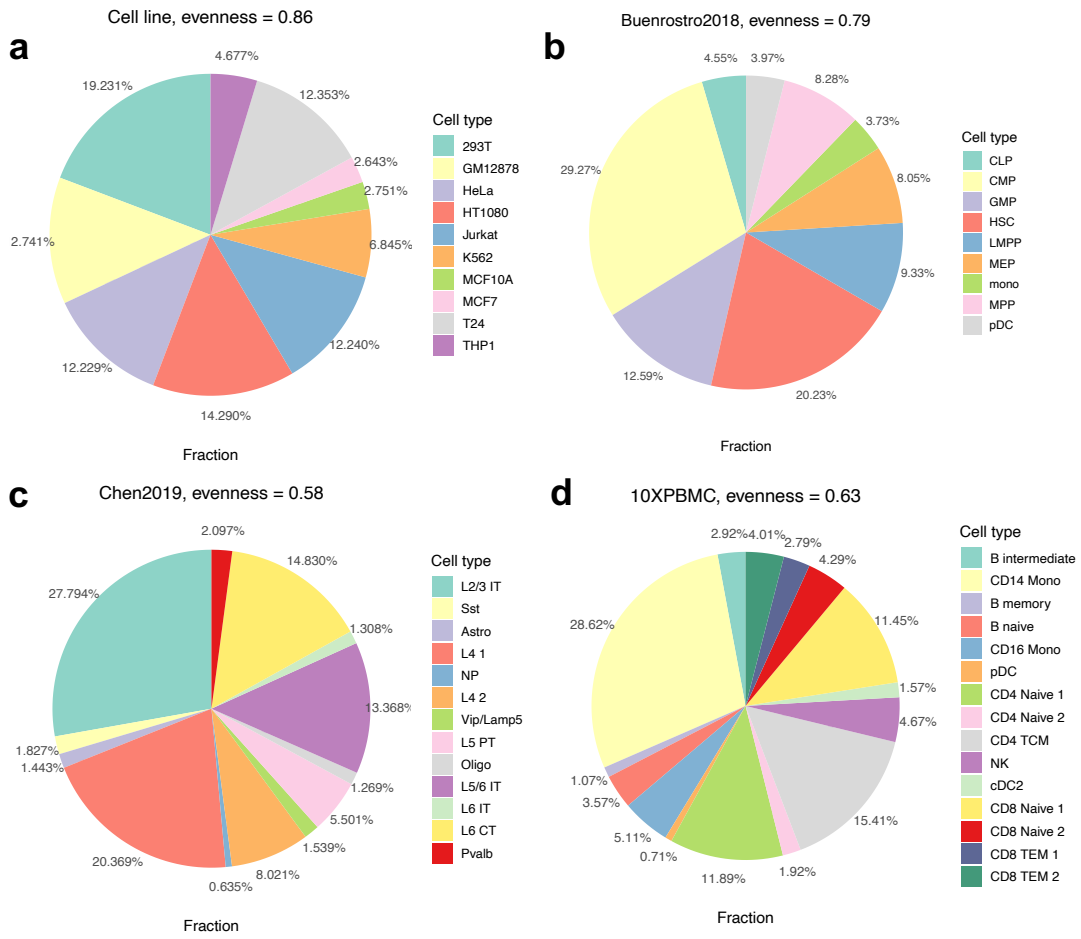

Figure S21: Cell type evenness of other datasets.
